# Supplementary material for: Reflex: intramolecular barcoding of long-range PCR products for sequencing multiple pooled DNAs
Source: PubMed Central journal article supplement — Nucleic Acids Res. 2013 Apr 10;41(10):e112. doi: 10.1093/nar/gkt228 (PMC3664814; doi:10.1093/nar/gkt228), 2013-04-10
Supplement: supp_gkt228_nar-00066-met-k-2013-File005.pdf [file supp_gkt228_nar-00066-met-k-2013-File005.pdf]

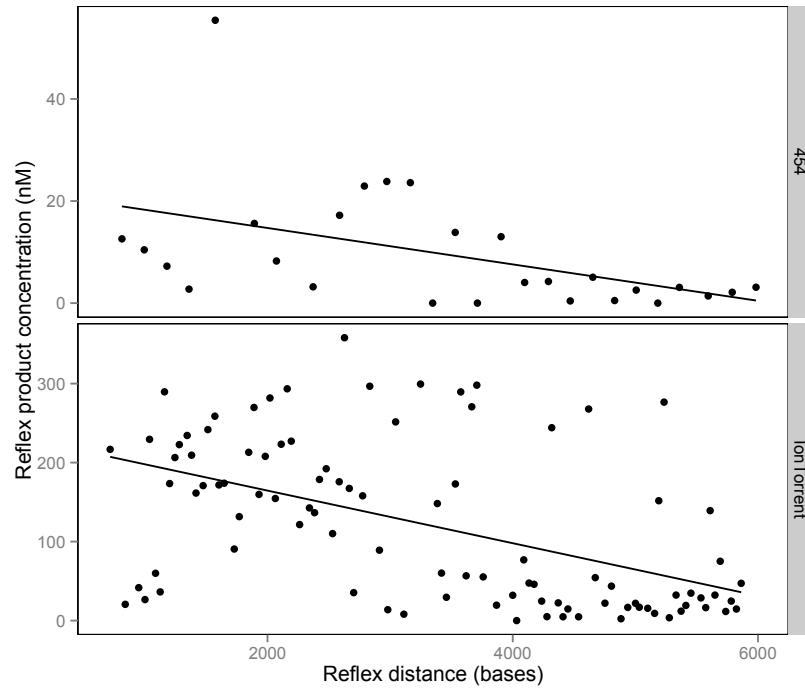

Figure S1. Effect of Reflex distance on Reflex product concentration. Reflex product concentration after Reflex PCR was measured using a MultiNA gel electrophoresis system for both 454 and Ion Torrent amplicons. Data are fitted to a linear model in each case using R. Results of the 454 linear fit are slope =  $-0.003567$  (SE =  $0.001335$ ), intercept =  $21.85$  (SE =  $5.06$ ), and R-squared =  $0.22$ . Results of the Ion Torrent linear fit are slope =  $-0.033299$  (SE =  $0.005811$ ), intercept =  $231.15$  (SE =  $21.30$ ), and R-squared =  $0.26$ .

## 454

| Number of LRPCRs and target size |                      |         |          |           |
|----------------------------------|----------------------|---------|----------|-----------|
|                                  | 1 LRPCR              | 1 LRPCR | 5 LRPCRs | 10 LRPCRs |
| Samples                          | <i>CYP2D6</i> (6 kb) | 10 kb   | 50 kb    | 100 kb    |
| 96                               | \$55.65              | \$60.81 | \$304.05 | \$608.10  |
| 960                              | \$8.40               | \$10.00 | \$50.01  | \$100.02  |
| 4800                             | \$4.19               | \$5.49  | \$27.43  | \$54.86   |
| 9600                             | \$3.67               | \$4.92  | \$24.61  | \$49.21   |

## Ion Torrent

| Number of LRPCRs and target size |                      |         |          |           |
|----------------------------------|----------------------|---------|----------|-----------|
|                                  | 1 LRPCR              | 1 LRPCR | 5 LRPCRs | 10 LRPCRs |
| Samples                          | <i>CYP2D6</i> (6 kb) | 10 kb   | 50 kb    | 100 kb    |
| 96                               | \$75.14              | \$93.32 | \$466.58 | \$933.17  |
| 960                              | \$14.47              | \$20.13 | \$100.63 | \$201.27  |
| 4800                             | \$9.07               | \$13.62 | \$68.11  | \$136.21  |
| 9600                             | \$8.40               | \$12.81 | \$64.04  | \$128.08  |

## Illumina

| Number of LRPCRs and target size |                      |         |          |           |
|----------------------------------|----------------------|---------|----------|-----------|
|                                  | 1 LRPCR              | 1 LRPCR | 5 LRPCRs | 10 LRPCRs |
| Samples                          | <i>CYP2D6</i> (6 kb) | 10 kb   | 50 kb    | 100 kb    |
| 96                               | \$67.64              | \$80.80 | \$403.98 | \$807.96  |
| 960                              | \$12.13              | \$16.23 | \$81.14  | \$162.27  |
| 4800                             | \$7.19               | \$10.49 | \$52.44  | \$104.88  |
| 9600                             | \$6.58               | \$9.77  | \$48.85  | \$97.70   |

Table S2: Reflex reagent cost per sample analysis. Three variables are applied, the number of samples, the target size (number of LRPCRs), and the NGS platform. LRPCR size limit is set at 10 kb for larger projects. Sample sizes in multiples of 96. Cost per sample in US dollars (\$). Different Reflex amplicon sizes are used for the three NGS platforms, and therefore define the number of Reflex reactions required. See materials and methods for further calculation details.

Table S3: Long range PCR primer sequences

| Name                 | Sequence                                                                     |
|----------------------|------------------------------------------------------------------------------|
| cyp2d6-lrpcr3-mid-01 | CCATCTCATCCCTGCGTGTCTCCGACTCAGTACGTACGTACGACTCACTATAGGGAGAGGCTCAGTCCTGGGCTTC |
| cyp2d6-lrpcr3-mid-02 | CCATCTCATCCCTGCGTGTCTCCGACTCAGCGACGACGTACGACTCACTATAGGGAGAGGCTCAGTCCTGGGCTTC |
| cyp2d6-lrpcr3-mid-03 | CCATCTCATCCCTGCGTGTCTCCGACTCAGCGTACGTACACGACTCACTATAGGGAGAGGCTCAGTCCTGGGCTTC |
| cyp2d6-lrpcr3-mid-04 | CCATCTCATCCCTGCGTGTCTCCGACTCAGCGTACGTGTCGACTCACTATAGGGAGAGGCTCAGTCCTGGGCTTC  |
| cyp2d6-lrpcr3-mid-05 | CCATCTCATCCCTGCGTGTCTCCGACTCAGCGTACTAGTACGACTCACTATAGGGAGAGGCTCAGTCCTGGGCTTC |
| cyp2d6-lrpcr3-mid-06 | CCATCTCATCCCTGCGTGTCTCCGACTCAGCGTGTACGTACGACTCACTATAGGGAGAGGCTCAGTCCTGGGCTTC |
| cyp2d6-lrpcr3-mid-07 | CCATCTCATCCCTGCGTGTCTCCGACTCAGACGACGTACTCGACTCACTATAGGGAGAGGCTCAGTCCTGGGCTTC |
| cyp2d6-lrpcr3-mid-08 | CCATCTCATCCCTGCGTGTCTCCGACTCAGACGACGTGTACGACTCACTATAGGGAGAGGCTCAGTCCTGGGCTTC |
| cyp2d6-lrpcr3-mid-09 | CCATCTCATCCCTGCGTGTCTCCGACTCAGACGTACACGACGACTCACTATAGGGAGAGGCTCAGTCCTGGGCTTC |
| cyp2d6-lrpcr3-mid-10 | CCATCTCATCCCTGCGTGTCTCCGACTCAGACGTAGTACGCGACTCACTATAGGGAGAGGCTCAGTCCTGGGCTTC |
| cyp2d6-lrpcr3-mid-11 | CCATCTCATCCCTGCGTGTCTCCGACTCAGACGTAGTCTACGACTCACTATAGGGAGAGGCTCAGTCCTGGGCTTC |
| cyp2d6-lrpcr3-mid-12 | CCATCTCATCCCTGCGTGTCTCCGACTCAGACTACGACTACGACTCACTATAGGGAGAGGCTCAGTCCTGGGCTTC |
| cyp2d6-lrpcr3-mid-13 | CCATCTCATCCCTGCGTGTCTCCGACTCAGACTACTCGTACGACTCACTATAGGGAGAGGCTCAGTCCTGGGCTTC |
| cyp2d6-lrpcr3-mid-14 | CCATCTCATCCCTGCGTGTCTCCGACTCAGAGTAGACGTACGACTCACTATAGGGAGAGGCTCAGTCCTGGGCTTC |
| cyp2d6-lrpcr3-mid-15 | CCATCTCATCCCTGCGTGTCTCCGACTCAGTACACGACGTCGACTCACTATAGGGAGAGGCTCAGTCCTGGGCTTC |
| cyp2d6-lrpcr3-mid-16 | CCATCTCATCCCTGCGTGTCTCCGACTCAGTACACGTATACGACTCACTATAGGGAGAGGCTCAGTCCTGGGCTTC |
| cyp2d6-lrpcr3-mid-17 | CCATCTCATCCCTGCGTGTCTCCGACTCAGTACGACACTACGACTCACTATAGGGAGAGGCTCAGTCCTGGGCTTC |
| cyp2d6-lrpcr3-mid-18 | CCATCTCATCCCTGCGTGTCTCCGACTCAGTACGACGAGACGACTCACTATAGGGAGAGGCTCAGTCCTGGGCTTC |
| cyp2d6-lrpcr3-mid-19 | CCATCTCATCCCTGCGTGTCTCCGACTCAGTACGACGTGCGGACTCACTATAGGGAGAGGCTCAGTCCTGGGCTTC |
| cyp2d6-lrpcr3-mid-20 | CCATCTCATCCCTGCGTGTCTCCGACTCAGTACGCGTAGTCGACTCACTATAGGGAGAGGCTCAGTCCTGGGCTTC |
| cyp2d6-lrpcr3-mid-21 | CCATCTCATCCCTGCGTGTCTCCGACTCAGTACGTACTCTCGACTCACTATAGGGAGAGGCTCAGTCCTGGGCTTC |

|                      |                                                                               |
|----------------------|-------------------------------------------------------------------------------|
| cyp2d6-lrPCR3-mid-22 | CCATCTCATCCCTGCGTGTCTCCGACTCAGTACGTATAGACGACTCACTATAGGGAGAGGCTCAGTCCTGGGCTTC  |
| cyp2d6-lrPCR3-mid-23 | CCATCTCATCCCTGCGTGTCTCCGACTCAGTACGTGACTCGACTCACTATAGGGAGAGGCTCAGTCCTGGGCTTC   |
| cyp2d6-lrPCR3-mid-24 | CCATCTCATCCCTGCGTGTCTCCGACTCAGTACTACGTGTCGACTCACTATAGGGAGAGGCTCAGTCCTGGGCTTC  |
| cyp2d6-lrPCR3-mid-25 | CCATCTCATCCCTGCGTGTCTCCGACTCAGTACTACTACGCGACTCACTATAGGGAGAGGCTCAGTCCTGGGCTTC  |
| cyp2d6-lrPCR3-mid-26 | CCATCTCATCCCTGCGTGTCTCCGACTCAGTACTAGACGACGACTCACTATAGGGAGAGGCTCAGTCCTGGGCTTC  |
| cyp2d6-lrPCR3-mid-27 | CCATCTCATCCCTGCGTGTCTCCGACTCAGTACTCGAGTACGACTCACTATAGGGAGAGGCTCAGTCCTGGGCTTC  |
| cyp2d6-lrPCR3-mid-28 | CCATCTCATCCCTGCGTGTCTCCGACTCAGTAGACGCGTACGACTCACTATAGGGAGAGGCTCAGTCCTGGGCTTC  |
| cyp2d6-lrPCR3-mid-29 | CCATCTCATCCCTGCGTGTCTCCGACTCAGTAGACTACGACGACTCACTATAGGGAGAGGCTCAGTCCTGGGCTTC  |
| cyp2d6-lrPCR3-mid-30 | CCATCTCATCCCTGCGTGTCTCCGACTCAGTAGTAGTACTCGACTCACTATAGGGAGAGGCTCAGTCCTGGGCTTC  |
| cyp2d6-lrPCR3-mid-31 | CCATCTCATCCCTGCGTGTCTCCGACTCAGTCGAGTACGTGACTCACTATAGGGAGAGGCTCAGTCCTGGGCTTC   |
| cyp2d6-lrPCR3-mid-32 | CCATCTCATCCCTGCGTGTCTCCGACTCAGTCGTAGAGTACGACTCACTATAGGGAGAGGCTCAGTCCTGGGCTTC  |
| cyp2d6-lrPCR3-mid-33 | CCATCTCATCCCTGCGTGTCTCCGACTCAGTCGTCTCGTACGACTCACTATAGGGAGAGGCTCAGTCCTGGGCTTC  |
| cyp2d6-lrPCR3-mid-34 | CCATCTCATCCCTGCGTGTCTCCGACTCAGTCTACGTAGACGACTCACTATAGGGAGAGGCTCAGTCCTGGGCTTC  |
| cyp2d6-lrPCR3-mid-35 | CCATCTCATCCCTGCGTGTCTCCGACTCAGTCTATACGTACGACTCACTATAGGGAGAGGCTCAGTCCTGGGCTTC  |
| cyp2d6-lrPCR3-mid-36 | CCATCTCATCCCTGCGTGTCTCCGACTCAGTGTACGTCTACGACTCACTATAGGGAGAGGCTCAGTCCTGGGCTTC  |
| cyp2d6-lrPCR3-mid-37 | CCATCTCATCCCTGCGTGTCTCCGACTCAGTGTAGTACGACGACTCACTATAGGGAGAGGCTCAGTCCTGGGCTTC  |
| cyp2d6-lrPCR3-mid-38 | CCATCTCATCCCTGCGTGTCTCCGACTCAGCACACACGTACGACTCACTATAGGGAGAGGCTCAGTCCTGGGCTTC  |
| cyp2d6-lrPCR3-mid-39 | CCATCTCATCCCTGCGTGTCTCCGACTCAGCACAGTACGTGACTCACTATAGGGAGAGGCTCAGTCCTGGGCTTC   |
| cyp2d6-lrPCR3-mid-40 | CCATCTCATCCCTGCGTGTCTCCGACTCAGCACGACGCGTACGACTCACTATAGGGAGAGGCTCAGTCCTGGGCTTC |
| cyp2d6-lrPCR3-mid-41 | CCATCTCATCCCTGCGTGTCTCCGACTCAGCACGACTATACGACTCACTATAGGGAGAGGCTCAGTCCTGGGCTTC  |
| cyp2d6-lrPCR3-mid-42 | CCATCTCATCCCTGCGTGTCTCCGACTCAGCACGAGAGTACGACTCACTATAGGGAGAGGCTCAGTCCTGGGCTTC  |
| cyp2d6-lrPCR3-mid-43 | CCATCTCATCCCTGCGTGTCTCCGACTCAGCACGTACTAGCGACTCACTATAGGGAGAGGCTCAGTCCTGGGCTTC  |
| cyp2d6-lrPCR3-mid-44 | CCATCTCATCCCTGCGTGTCTCCGACTCAGCACGTAGTGTGACTCACTATAGGGAGAGGCTCAGTCCTGGGCTTC   |

|                      |                                                                              |
|----------------------|------------------------------------------------------------------------------|
| cyp2d6-lrPCR3-mid-45 | CCATCTCATCCCTGCGTGTCTCCGACTCAGCACGTCGCTACGACTCACTATAGGGAGAGGCTCAGTCCTGGGCTTC |
| cyp2d6-lrPCR3-mid-46 | CCATCTCATCCCTGCGTGTCTCCGACTCAGCACTACGTCACGACTCACTATAGGGAGAGGCTCAGTCCTGGGCTTC |
| cyp2d6-lrPCR3-mid-47 | CCATCTCATCCCTGCGTGTCTCCGACTCAGCACTATACTACGACTCACTATAGGGAGAGGCTCAGTCCTGGGCTTC |
| cyp2d6-lrPCR3-mid-48 | CCATCTCATCCCTGCGTGTCTCCGACTCAGCACTCGTCGTCGACTCACTATAGGGAGAGGCTCAGTCCTGGGCTTC |
| cyp2d6-lrPCR3-mid-49 | CCATCTCATCCCTGCGTGTCTCCGACTCAGCAGACGTAGACGACTCACTATAGGGAGAGGCTCAGTCCTGGGCTTC |
| cyp2d6-lrPCR3-mid-50 | CCATCTCATCCCTGCGTGTCTCCGACTCAGCAGTACGCGACGACTCACTATAGGGAGAGGCTCAGTCCTGGGCTTC |
| cyp2d6-lrPCR3-mid-51 | CCATCTCATCCCTGCGTGTCTCCGACTCAGCAGTACGTATCGACTCACTATAGGGAGAGGCTCAGTCCTGGGCTTC |
| cyp2d6-lrPCR3-mid-52 | CCATCTCATCCCTGCGTGTCTCCGACTCAGCGACACTCGACGACTCACTATAGGGAGAGGCTCAGTCCTGGGCTTC |
| cyp2d6-lrPCR3-mid-53 | CCATCTCATCCCTGCGTGTCTCCGACTCAGCGACAGTATACGACTCACTATAGGGAGAGGCTCAGTCCTGGGCTTC |
| cyp2d6-lrPCR3-mid-54 | CCATCTCATCCCTGCGTGTCTCCGACTCAGCGACGAGTCTCGACTCACTATAGGGAGAGGCTCAGTCCTGGGCTTC |
| cyp2d6-lrPCR3-mid-55 | CCATCTCATCCCTGCGTGTCTCCGACTCAGCGACGTAGCGGACTCACTATAGGGAGAGGCTCAGTCCTGGGCTTC  |
| cyp2d6-lrPCR3-mid-56 | CCATCTCATCCCTGCGTGTCTCCGACTCAGCGACGTCTATCGACTCACTATAGGGAGAGGCTCAGTCCTGGGCTTC |
| cyp2d6-lrPCR3-mid-57 | CCATCTCATCCCTGCGTGTCTCCGACTCAGCGACTACAGACGACTCACTATAGGGAGAGGCTCAGTCCTGGGCTTC |
| cyp2d6-lrPCR3-mid-58 | CCATCTCATCCCTGCGTGTCTCCGACTCAGCGACTCACTACGACTCACTATAGGGAGAGGCTCAGTCCTGGGCTTC |
| cyp2d6-lrPCR3-mid-59 | CCATCTCATCCCTGCGTGTCTCCGACTCAGCGACTCGTAGCGACTCACTATAGGGAGAGGCTCAGTCCTGGGCTTC |
| cyp2d6-lrPCR3-mid-60 | CCATCTCATCCCTGCGTGTCTCCGACTCAGCGAGACTACTCGACTCACTATAGGGAGAGGCTCAGTCCTGGGCTTC |
| cyp2d6-lrPCR3-mid-61 | CCATCTCATCCCTGCGTGTCTCCGACTCAGCGAGTACGAGCGACTCACTATAGGGAGAGGCTCAGTCCTGGGCTTC |
| cyp2d6-lrPCR3-mid-62 | CCATCTCATCCCTGCGTGTCTCCGACTCAGCGAGTACTCACGACTCACTATAGGGAGAGGCTCAGTCCTGGGCTTC |
| cyp2d6-lrPCR3-mid-63 | CCATCTCATCCCTGCGTGTCTCCGACTCAGCGAGTAGACTCGACTCACTATAGGGAGAGGCTCAGTCCTGGGCTTC |
| cyp2d6-lrPCR3-mid-64 | CCATCTCATCCCTGCGTGTCTCCGACTCAGCGAGTATATACGACTCACTATAGGGAGAGGCTCAGTCCTGGGCTTC |
| cyp2d6-lrPCR3-mid-65 | CCATCTCATCCCTGCGTGTCTCCGACTCAGCGAGTGTACGCGACTCACTATAGGGAGAGGCTCAGTCCTGGGCTTC |
| cyp2d6-lrPCR3-mid-66 | CCATCTCATCCCTGCGTGTCTCCGACTCAGCGATACACGTCGACTCACTATAGGGAGAGGCTCAGTCCTGGGCTTC |
| cyp2d6-lrPCR3-mid-67 | CCATCTCATCCCTGCGTGTCTCCGACTCAGCGATCGTCGACGACTCACTATAGGGAGAGGCTCAGTCCTGGGCTTC |

|                      |                                                                              |
|----------------------|------------------------------------------------------------------------------|
| cyp2d6-lrPCR3-mid-68 | CCATCTCATCCCTGCGTGTCTCCGACTCAGCGCGGACGTCGACTCACTATAGGGAGAGGCTCAGTCCTGGGCTTC  |
| cyp2d6-lrPCR3-mid-69 | CCATCTCATCCCTGCGTGTCTCCGACTCAGCGCGGTAGACGACTCACTATAGGGAGAGGCTCAGTCCTGGGCTTC  |
| cyp2d6-lrPCR3-mid-70 | CCATCTCATCCCTGCGTGTCTCCGACTCAGCGCGCTCGTACGACTCACTATAGGGAGAGGCTCAGTCCTGGGCTTC |
| cyp2d6-lrPCR3-mid-71 | CCATCTCATCCCTGCGTGTCTCCGACTCAGCGGTACAGTCGACTCACTATAGGGAGAGGCTCAGTCCTGGGCTTC  |
| cyp2d6-lrPCR3-mid-72 | CCATCTCATCCCTGCGTGTCTCCGACTCAGCGGTATCGACGACTCACTATAGGGAGAGGCTCAGTCCTGGGCTTC  |
| cyp2d6-lrPCR3-mid-73 | CCATCTCATCCCTGCGTGTCTCCGACTCAGCGGTCTACACGACTCACTATAGGGAGAGGCTCAGTCCTGGGCTTC  |
| cyp2d6-lrPCR3-mid-74 | CCATCTCATCCCTGCGTGTCTCCGACTCAGCGTACGACGCGACTCACTATAGGGAGAGGCTCAGTCCTGGGCTTC  |
| cyp2d6-lrPCR3-mid-75 | CCATCTCATCCCTGCGTGTCTCCGACTCAGCGTACTCTACGACTCACTATAGGGAGAGGCTCAGTCCTGGGCTTC  |
| cyp2d6-lrPCR3-mid-76 | CCATCTCATCCCTGCGTGTCTCCGACTCAGCGTAGCGTACGACTCACTATAGGGAGAGGCTCAGTCCTGGGCTTC  |
| cyp2d6-lrPCR3-mid-77 | CCATCTCATCCCTGCGTGTCTCCGACTCAGCGTACACACTCGACTCACTATAGGGAGAGGCTCAGTCCTGGGCTTC |
| cyp2d6-lrPCR3-mid-78 | CCATCTCATCCCTGCGTGTCTCCGACTCAGCGTACACTAGCGACTCACTATAGGGAGAGGCTCAGTCCTGGGCTTC |
| cyp2d6-lrPCR3-mid-79 | CCATCTCATCCCTGCGTGTCTCCGACTCAGCGTACAGAGACGACTCACTATAGGGAGAGGCTCAGTCCTGGGCTTC |
| cyp2d6-lrPCR3-mid-80 | CCATCTCATCCCTGCGTGTCTCCGACTCAGCGTACTATCGCGACTCACTATAGGGAGAGGCTCAGTCCTGGGCTTC |
| cyp2d6-lrPCR3-mid-81 | CCATCTCATCCCTGCGTGTCTCCGACTCAGCGTAGACGATCGACTCACTATAGGGAGAGGCTCAGTCCTGGGCTTC |
| cyp2d6-lrPCR3-mid-82 | CCATCTCATCCCTGCGTGTCTCCGACTCAGCGTAGAGTGTGACTCACTATAGGGAGAGGCTCAGTCCTGGGCTTC  |
| cyp2d6-lrPCR3-mid-83 | CCATCTCATCCCTGCGTGTCTCCGACTCAGCGTAGCTCGACGACTCACTATAGGGAGAGGCTCAGTCCTGGGCTTC |
| cyp2d6-lrPCR3-mid-84 | CCATCTCATCCCTGCGTGTCTCCGACTCAGCGTAGTCTCTCGACTCACTATAGGGAGAGGCTCAGTCCTGGGCTTC |
| cyp2d6-lrPCR3-mid-85 | CCATCTCATCCCTGCGTGTCTCCGACTCAGCGTATACTGACGACTCACTATAGGGAGAGGCTCAGTCCTGGGCTTC |
| cyp2d6-lrPCR3-mid-86 | CCATCTCATCCCTGCGTGTCTCCGACTCAGCGTATCGATACGACTCACTATAGGGAGAGGCTCAGTCCTGGGCTTC |
| cyp2d6-lrPCR3-mid-87 | CCATCTCATCCCTGCGTGTCTCCGACTCAGCGTATGTGTACGACTCACTATAGGGAGAGGCTCAGTCCTGGGCTTC |
| cyp2d6-lrPCR3-mid-88 | CCATCTCATCCCTGCGTGTCTCCGACTCAGCGTACGCTACGACTCACTATAGGGAGAGGCTCAGTCCTGGGCTTC  |
| cyp2d6-lrPCR3-mid-89 | CCATCTCATCCCTGCGTGTCTCCGACTCAGCGTACGACTCGACTCACTATAGGGAGAGGCTCAGTCCTGGGCTTC  |
| cyp2d6-lrPCR3-mid-90 | CCATCTCATCCCTGCGTGTCTCCGACTCAGCGTCTACTATCGACTCACTATAGGGAGAGGCTCAGTCCTGGGCTTC |

|                                                 |                                                                              |
|-------------------------------------------------|------------------------------------------------------------------------------|
| cyp2d6-lrpcr3-mid-91                            | CCATCTCATCCCTGCGTGTCTCCGACTCAGCGTCTATACACGACTCACTATAGGGAGAGGCTCAGTCCTGGGCTTC |
| cyp2d6-lrpcr3-mid-92                            | CCATCTCATCCCTGCGTGTCTCCGACTCAGCGTCTCGACTCGACTCACTATAGGGAGAGGCTCAGTCCTGGGCTTC |
| cyp2d6-lrpcr3-mid-93                            | CCATCTCATCCCTGCGTGTCTCCGACTCAGCGTCTCTCGTCGACTCACTATAGGGAGAGGCTCAGTCCTGGGCTTC |
| cyp2d6-lrpcr3-mid-94                            | CCATCTCATCCCTGCGTGTCTCCGACTCAGCGTCTGACGACGACTCACTATAGGGAGAGGCTCAGTCCTGGGCTTC |
| cyp2d6-lrpcr3-mid-95                            | CCATCTCATCCCTGCGTGTCTCCGACTCAGCTACACTGTACGACTCACTATAGGGAGAGGCTCAGTCCTGGGCTTC |
| cyp2d6-lrpcr3-mid-96                            | CCATCTCATCCCTGCGTGTCTCCGACTCAGCTACATACGACGACTCACTATAGGGAGAGGCTCAGTCCTGGGCTTC |
| cyp2d6-lrpcr-reverse<br>(common reverse primer) | AGGGGGTCCACTTGATGTC                                                          |

Table S4: Reflex extension primer sequences for 454

| Name                     | Sequence                                |
|--------------------------|-----------------------------------------|
| cyp2d6_reflex_ext_454_01 | CGACTCACTATAGGGAGAGGTATCACCCAGGAGCCAG   |
| cyp2d6_reflex_ext_454_02 | CGACTCACTATAGGGAGATCATCACCAACCTGTCATCG  |
| cyp2d6_reflex_ext_454_03 | CGACTCACTATAGGGAGATGTGACTGCGCCCTGC      |
| cyp2d6_reflex_ext_454_04 | CGACTCACTATAGGGAGACCTAGTCCTCAATGCCACCA  |
| cyp2d6_reflex_ext_454_05 | CGACTCACTATAGGGAGAGCCCTACACCACTGCCG     |
| cyp2d6_reflex_ext_454_06 | CGACTCACTATAGGGAGAGGGCCCTCCTGCTCAT      |
| cyp2d6_reflex_ext_454_07 | CGACTCACTATAGGGAGAGGGCTGACAGGTGCAGAAT   |
| cyp2d6_reflex_ext_454_08 | CGACTCACTATAGGGAGACTGGTGTAGGTGCTGAATGC  |
| cyp2d6_reflex_ext_454_09 | CGACTCACTATAGGGAGAGAGGCCAAGGACTCTGTACCT |
| cyp2d6_reflex_ext_454_10 | CGACTCACTATAGGGAGAAGCGAGAGACCGAGGAGTC   |
| cyp2d6_reflex_ext_454_11 | CGACTCACTATAGGGAGACATCTCCCACCCCCAG      |
| cyp2d6_reflex_ext_454_12 | CGACTCACTATAGGGAGAGCGAGCAGAGGCGCT       |

|                          |                                         |
|--------------------------|-----------------------------------------|
| cyp2d6_reflex_ext_454_13 | CGACTCACTATAGGGAGACAAGGTGGATGCACAAAGAG  |
| cyp2d6_reflex_ext_454_14 | CGACTCACTATAGGGAGAGCCCAATGGGTGAGGC      |
| cyp2d6_reflex_ext_454_15 | CGACTCACTATAGGGAGACCCGGGTGGGTGATGA      |
| cyp2d6_reflex_ext_454_16 | CGACTCACTATAGGGAGAGGACGTGTTTCAGCCTGC    |
| cyp2d6_reflex_ext_454_17 | CGACTCACTATAGGGAGACTCCATCACAGAAGGTGTGAC |
| cyp2d6_reflex_ext_454_18 | CGACTCACTATAGGGAGATGCCGTTTAAATCACGAAATC |
| cyp2d6_reflex_ext_454_19 | CGACTCACTATAGGGAGAGCATGAAGGACTGGATTTTCC |
| cyp2d6_reflex_ext_454_20 | CGACTCACTATAGGGAGATCCAGAACACACCATACTGCT |
| cyp2d6_reflex_ext_454_21 | CGACTCACTATAGGGAGAAGGAGCCCCATTTGGTAGTGA |
| cyp2d6_reflex_ext_454_22 | CGACTCACTATAGGGAGACGCCCTGGCCTGACTCT     |
| cyp2d6_reflex_ext_454_23 | CGACTCACTATAGGGAGAGGAGGTGGATGGCCG       |
| cyp2d6_reflex_ext_454_24 | CGACTCACTATAGGGAGAAGGGACCAGGCCCATGAT    |
| cyp2d6_reflex_ext_454_25 | CGACTCACTATAGGGAGAGCCGGGTCTGTATGTGTGT   |
| cyp2d6_reflex_ext_454_26 | CGACTCACTATAGGGAGACCCGGGAGGATGTTGTCAC   |
| cyp2d6_reflex_ext_454_27 | CGACTCACTATAGGGAGATGATGTCGAGACTGCAGTGAG |

Table S5: Reflex extension primer sequences for Ion Torrent

| Name                    | Sequence                               |
|-------------------------|----------------------------------------|
| cyp2d6_reflex_ext_IT_01 | CGACTCACTATAGGGAGATCTTCTTCACCTCCCTGCTG |
| cyp2d6_reflex_ext_IT_02 | CGACTCACTATAGGGAGACTGTCCCCCTTCCGTGGAG  |
| cyp2d6_reflex_ext_IT_03 | CGACTCACTATAGGGAGAAGAAGCCCTTCCGCTTCC   |
| cyp2d6_reflex_ext_IT_04 | CGACTCACTATAGGGAGACGCACTCATCACCAACCTG  |
| cyp2d6_reflex_ext_IT_05 | CGACTCACTATAGGGAGAAGTCCCCACTCTCACCTG   |



|                         |                                           |
|-------------------------|-------------------------------------------|
| cyp2d6_reflex_ext_IT_06 | CGACTCACTATAGGGAGAGTGTGTCCCCGTGTGT        |
| cyp2d6_reflex_ext_IT_07 | CGACTCACTATAGGGAGAAGGACTAGTTGACAGAGTCCAGC |
| cyp2d6_reflex_ext_IT_08 | CGACTCACTATAGGGAGAGGGTCGGAGAGGGTACTGTG    |
| cyp2d6_reflex_ext_IT_09 | CGACTCACTATAGGGAGACAGTGTGGGTGCCTCTGA      |
| cyp2d6_reflex_ext_IT_10 | CGACTCACTATAGGGAGACTGCCAGAATGTTGGAGGAC    |
| cyp2d6_reflex_ext_IT_11 | CGACTCACTATAGGGAGACCAGAGCCCCCGTCTAGT      |
| cyp2d6_reflex_ext_IT_12 | CGACTCACTATAGGGAGACACCACACTGACTGTCCCC     |
| cyp2d6_reflex_ext_IT_13 | CGACTCACTATAGGGAGACCCTCTAGGAACCCCTGGC     |
| cyp2d6_reflex_ext_IT_14 | CGACTCACTATAGGGAGATGGTGATAGCCCCAGCAT      |
| cyp2d6_reflex_ext_IT_15 | CGACTCACTATAGGGAGACTTCCGCATCCCTAAGGTAG    |
| cyp2d6_reflex_ext_IT_16 | CGACTCACTATAGGGAGATGTGACCCATATGACATCCC    |
| cyp2d6_reflex_ext_IT_17 | CGACTCACTATAGGGAGACTACACCACTGCCGTGATTC    |
| cyp2d6_reflex_ext_IT_18 | CGACTCACTATAGGGAGAGCGACCAGAGATGGGTGA      |
| cyp2d6_reflex_ext_IT_19 | CGACTCACTATAGGGAGAGCCGTGTCCAACAGGAGAT     |
| cyp2d6_reflex_ext_IT_20 | CGACTCACTATAGGGAGACCTCCAACATAGGAGGCAAG    |
| cyp2d6_reflex_ext_IT_21 | CGACTCACTATAGGGAGACTCCAAGCACAGGCTTGAC     |
| cyp2d6_reflex_ext_IT_22 | CGACTCACTATAGGGAGACATCTGGGAAACAGTGCAGG    |
| cyp2d6_reflex_ext_IT_23 | CGACTCACTATAGGGAGAGCCTCCTGCTCATGATCCTA    |
| cyp2d6_reflex_ext_IT_24 | CGACTCACTATAGGGAGACTCTGCCGGGATGGTGAC      |
| cyp2d6_reflex_ext_IT_25 | CGACTCACTATAGGGAGATGAGAGCAGCTTCAATGATGA   |
| cyp2d6_reflex_ext_IT_26 | CGACTCACTATAGGGAGAGAGTATGCTCTCGGCCCTG     |
| cyp2d6_reflex_ext_IT_27 | CGACTCACTATAGGGAGAGGTGCAGAATTGGAGGTCAT    |
| cyp2d6_reflex_ext_IT_28 | CGACTCACTATAGGGAGAAAAAGGTTGGACCAGTGCAT    |

|                         |                                         |
|-------------------------|-----------------------------------------|
| cyp2d6_reflex_ext_IT_29 | CGACTCACTATAGGGAGAGCAAGGGTGGTGGGTTGA    |
| cyp2d6_reflex_ext_IT_30 | CGACTCACTATAGGGAGATGGAGAAGGTGAGAGTGGCT  |
| cyp2d6_reflex_ext_IT_31 | CGACTCACTATAGGGAGATGAGCACAGGATGACCTGG   |
| cyp2d6_reflex_ext_IT_32 | CGACTCACTATAGGGAGACTCCTGCATATCCCAGCG    |
| cyp2d6_reflex_ext_IT_33 | CGACTCACTATAGGGAGAACCCCGTTCTGTCTGGTGTA  |
| cyp2d6_reflex_ext_IT_34 | CGACTCACTATAGGGAGAAGACTTGTCCAGGTGAACGC  |
| cyp2d6_reflex_ext_IT_35 | CGACTCACTATAGGGAGAGGTCAGTGGTAAGGACAGGC  |
| cyp2d6_reflex_ext_IT_36 | CGACTCACTATAGGGAGACTCTGGGCAAGGAGAGAGG   |
| cyp2d6_reflex_ext_IT_37 | CGACTCACTATAGGGAGAGCCAAGGACTCTGTACCTCCT |
| cyp2d6_reflex_ext_IT_38 | CGACTCACTATAGGGAGAGGTCGTGGGAGAGGTGTG    |
| cyp2d6_reflex_ext_IT_39 | CGACTCACTATAGGGAGAGTAAGAAGGGCCTGGAGGAG  |
| cyp2d6_reflex_ext_IT_40 | CGACTCACTATAGGGAGAATGGGTTTGGGAAAGGACAT  |
| cyp2d6_reflex_ext_IT_41 | CGACTCACTATAGGGAGAGAGTCTCTGCAGGGCGAG    |
| cyp2d6_reflex_ext_IT_42 | CGACTCACTATAGGGAGAAGGAGGGACTGAAGGAGGAG  |
| cyp2d6_reflex_ext_IT_43 | CGACTCACTATAGGGAGAAAACGTGATCGCCTCCCTC   |
| cyp2d6_reflex_ext_IT_44 | CGACTCACTATAGGGAGACTTACCCGCATCTCCCAC    |
| cyp2d6_reflex_ext_IT_45 | CGACTCACTATAGGGAGAGTGGGTGATGGGCAGAAG    |
| cyp2d6_reflex_ext_IT_46 | CGACTCACTATAGGGAGAAAAGTCGCTGGAGCAGTGG   |
| cyp2d6_reflex_ext_IT_47 | CGACTCACTATAGGGAGAGTGGGGCTAATGCCTTCAT   |
| cyp2d6_reflex_ext_IT_48 | CGACTCACTATAGGGAGAAGACGAGGTGGGGCAAAG    |
| cyp2d6_reflex_ext_IT_49 | CGACTCACTATAGGGAGACTTCCCTGAGTGCAAAGGC   |
| cyp2d6_reflex_ext_IT_50 | CGACTCACTATAGGGAGATGCTGTAAGCTCAGTGTGGG  |
| cyp2d6_reflex_ext_IT_51 | CGACTCACTATAGGGAGAAGCCCAATGGGTGAGGCT    |

|                         |                                             |
|-------------------------|---------------------------------------------|
| cyp2d6_reflex_ext_IT_52 | CGACTCACTATAGGGAGAGGGCTTGTGACGAGTGGG        |
| cyp2d6_reflex_ext_IT_53 | CGACTCACTATAGGGAGAGAAAACCACCTGCACTAGGGA     |
| cyp2d6_reflex_ext_IT_54 | CGACTCACTATAGGGAGAGGGTCGTGGACATGAAACA       |
| cyp2d6_reflex_ext_IT_55 | CGACTCACTATAGGGAGAGTGGGTGATGACCGTAGTCC      |
| cyp2d6_reflex_ext_IT_56 | CGACTCACTATAGGGAGAGTTCCCAAGGCAAGCAGC        |
| cyp2d6_reflex_ext_IT_57 | CGACTCACTATAGGGAGAGTCGTGCTCAATGGGCTG        |
| cyp2d6_reflex_ext_IT_58 | CGACTCACTATAGGGAGACCAAGGTTCAAATAGGACTAGGA   |
| cyp2d6_reflex_ext_IT_59 | CGACTCACTATAGGGAGAACCTGCTCACTCCTGGTAGC      |
| cyp2d6_reflex_ext_IT_60 | CGACTCACTATAGGGAGAACAGAAGGTGTGACCCCCAC      |
| cyp2d6_reflex_ext_IT_61 | CGACTCACTATAGGGAGAAAAGGTCATACCTGGGTGACG     |
| cyp2d6_reflex_ext_IT_62 | CGACTCACTATAGGGAGAGATGCTAACTGGGGCCTCTC      |
| cyp2d6_reflex_ext_IT_63 | CGACTCACTATAGGGAGACTTTTTGCACTGTGGGTCCCTC    |
| cyp2d6_reflex_ext_IT_64 | CGACTCACTATAGGGAGACACGAAATCGAGGATGAAGG      |
| cyp2d6_reflex_ext_IT_65 | CGACTCACTATAGGGAGAGGGAATGGAAGATGAGTTAGTCC   |
| cyp2d6_reflex_ext_IT_66 | CGACTCACTATAGGGAGACATATGTTATGGAGTACAAAGTCCC |
| cyp2d6_reflex_ext_IT_67 | CGACTCACTATAGGGAGAAAGCTGGACTTGGCAGTGG       |
| cyp2d6_reflex_ext_IT_68 | CGACTCACTATAGGGAGACCAAAGGCCAAGGAAGAGTA      |
| cyp2d6_reflex_ext_IT_69 | CGACTCACTATAGGGAGAGACCAGAAGCCAGGCTGA        |
| cyp2d6_reflex_ext_IT_70 | CGACTCACTATAGGGAGAGGAGGAGGTCCTGGAGGG        |
| cyp2d6_reflex_ext_IT_71 | CGACTCACTATAGGGAGACAACCTGCTGCATGTGGA        |
| cyp2d6_reflex_ext_IT_72 | CGACTCACTATAGGGAGATCCTGGTGGACCTGATGC        |
| cyp2d6_reflex_ext_IT_73 | CGACTCACTATAGGGAGATATGGGGCTAGAAGCACTGG      |
| cyp2d6_reflex_ext_IT_74 | CGACTCACTATAGGGAGAGTCCTGCCTGGTCCTCTGT       |

|                         |                                             |
|-------------------------|---------------------------------------------|
| cyp2d6_reflex_ext_IT_75 | CGACTCACTATAGGGAGAGCCATCATCAGCTCCCTTT       |
| cyp2d6_reflex_ext_IT_76 | CGACTCACTATAGGGAGAGGCCTGACTCTGCCACTG        |
| cyp2d6_reflex_ext_IT_77 | CGACTCACTATAGGGAGAAAAGAACCTCTGGAGCAGCC      |
| cyp2d6_reflex_ext_IT_78 | CGACTCACTATAGGGAGAGGTGACTTCTCCGACCAGG       |
| cyp2d6_reflex_ext_IT_79 | CGACTCACTATAGGGAGAACCTGGTTATCCCAGAAGG       |
| cyp2d6_reflex_ext_IT_80 | CGACTCACTATAGGGAGACCTAGCTGGGAGGTGGATG       |
| cyp2d6_reflex_ext_IT_81 | CGACTCACTATAGGGAGACATGTTCTGGAGGAGGGGT       |
| cyp2d6_reflex_ext_IT_82 | CGACTCACTATAGGGAGAGTCACTCTGGAGTGGGCAG       |
| cyp2d6_reflex_ext_IT_83 | CGACTCACTATAGGGAGACATCAGGAGCTCTAAGGCC       |
| cyp2d6_reflex_ext_IT_84 | CGACTCACTATAGGGAGAGCAAGGTGAAGTGAAGGGAC      |
| cyp2d6_reflex_ext_IT_85 | CGACTCACTATAGGGAGACCATCAGGTGTGTGCATAGC      |
| cyp2d6_reflex_ext_IT_86 | CGACTCACTATAGGGAGACAAGTGGACAAGTGTCTGGG      |
| cyp2d6_reflex_ext_IT_87 | CGACTCACTATAGGGAGACAGTGTGAGTCTGTGTATGTGTGAA |
| cyp2d6_reflex_ext_IT_88 | CGACTCACTATAGGGAGATGACTGGTGTGTGTGAGAGAGA    |
| cyp2d6_reflex_ext_IT_89 | CGACTCACTATAGGGAGAAAAGTGGGGTACTTGGTGCC      |
| cyp2d6_reflex_ext_IT_90 | CGACTCACTATAGGGAGAAAGGAGTGGTCCCATCCAGG      |
| cyp2d6_reflex_ext_IT_91 | CGACTCACTATAGGGAGACAGAGCCCAGGAATGTGG        |
| cyp2d6_reflex_ext_IT_92 | CGACTCACTATAGGGAGAAAGCTCTGGGAACAGCCCT       |
| cyp2d6_reflex_ext_IT_93 | CGACTCACTATAGGGAGAAATGTTGTACAGGCTGGGG       |
| cyp2d6_reflex_ext_IT_94 | CGACTCACTATAGGGAGAAAAGCAGTGGAGGAGGAC        |
| cyp2d6_reflex_ext_IT_95 | CGACTCACTATAGGGAGAAAACGTTCCCACCAGATTTCTAA   |

Table S6: Reflex PCR primer sequences for 454

| Name                         | Sequence                                            |
|------------------------------|-----------------------------------------------------|
| 454A (common reverse primer) | CCATCTCATCCCTGCGTGTCTCCGACTCAG                      |
| cyp2d6-ref-pcr-454-01        | CCTATCCCCTGTGTGCCTTGGCAGTCTCAGAGTCCTTGTCATCAATCTGGG |
| cyp2d6-ref-pcr-454-02        | CCTATCCCCTGTGTGCCTTGGCAGTCTCAGCGAGGGCGTGAGCAGG      |
| cyp2d6-ref-pcr-454-03        | CCTATCCCCTGTGTGCCTTGGCAGTCTCAGCGAGAAGCTGAAGTGCTGC   |
| cyp2d6-ref-pcr-454-04        | CCTATCCCCTGTGTGCCTTGGCAGTCTCAGCACCTGCTGAGAAAAGGCA   |
| cyp2d6-ref-pcr-454-05        | CCTATCCCCTGTGTGCCTTGGCAGTCTCAGCTGGACTCTAGGATGCTGGG  |
| cyp2d6-ref-pcr-454-06        | CCTATCCCCTGTGTGCCTTGGCAGTCTCAGGTGGCATTGAGGACTAGGTG  |
| cyp2d6-ref-pcr-454-07        | CCTATCCCCTGTGTGCCTTGGCAGTCTCAGGGCAGTGGTGTAGGGCAT    |
| cyp2d6-ref-pcr-454-08        | CCTATCCCCTGTGTGCCTTGGCAGTCTCAGGGATCATGAGCAGGAGGC    |
| cyp2d6-ref-pcr-454-09        | CCTATCCCCTGTGTGCCTTGGCAGTCTCAGACCTCCAATTCTGCACCTG   |
| cyp2d6-ref-pcr-454-10        | CCTATCCCCTGTGTGCCTTGGCAGTCTCAGTCATCCAGCTGGGTCAGG    |
| cyp2d6-ref-pcr-454-11        | CCTATCCCCTGTGTGCCTTGGCAGTCTCAGCCAGGGCCTGCCTGTC      |
| cyp2d6-ref-pcr-454-12        | CCTATCCCCTGTGTGCCTTGGCAGTCTCAGCTGAGATGTCCCCTCCTCC   |
| cyp2d6-ref-pcr-454-13        | CCTATCCCCTGTGTGCCTTGGCAGTCTCAGCTGAGCTAGGTCCAGCAGC   |
| cyp2d6-ref-pcr-454-14        | CCTATCCCCTGTGTGCCTTGGCAGTCTCAGTGTGCCCTTCTGCCCAT     |
| cyp2d6-ref-pcr-454-15        | CCTATCCCCTGTGTGCCTTGGCAGTCTCAGCCTGGGGGTGGGACG       |
| cyp2d6-ref-pcr-454-16        | CCTATCCCCTGTGTGCCTTGGCAGTCTCAGCCCCACCTCGTCTCTGC     |
| cyp2d6-ref-pcr-454-17        | CCTATCCCCTGTGTGCCTTGGCAGTCTCAGCCCCGCCACTCGTC        |
| cyp2d6-ref-pcr-454-18        | CCTATCCCCTGTGTGCCTTGGCAGTCTCAGCGCTGCTTGCCTTGG       |
| cyp2d6-ref-pcr-454-19        | CCTATCCCCTGTGTGCCTTGGCAGTCTCAGCCCCAGACTACAGGTCC     |
| cyp2d6-ref-pcr-454-20        | CCTATCCCCTGTGTGCCTTGGCAGTCTCAGGCCGAGAGGCCCCAG       |
| cyp2d6-ref-pcr-454-21        | CCTATCCCCTGTGTGCCTTGGCAGTCTCAGCTGGTGTGAGCAGAAGGGA   |
| cyp2d6-ref-pcr-454-22        | CCTATCCCCTGTGTGCCTTGGCAGTCTCAGCTGCTTCCCCTTCTCAGC    |
| cyp2d6-ref-pcr-454-23        | CCTATCCCCTGTGTGCCTTGGCAGTCTCAGGGGCAGTGGCAGGGG       |
| cyp2d6-ref-pcr-454-24        | CCTATCCCCTGTGTGCCTTGGCAGTCTCAGACCAGGCACAGAGGACC     |
| cyp2d6-ref-pcr-454-25        | CCTATCCCCTGTGTGCCTTGGCAGTCTCAGCTGCTCCAGGCCCTTACC    |
| cyp2d6-ref-pcr-454-26        | CCTATCCCCTGTGTGCCTTGGCAGTCTCAGGCCCTTCCCCTACCCCC     |
| cyp2d6-ref-pcr-454-27        | CCTATCCCCTGTGTGCCTTGGCAGTCTCAGCCCAGACACTTGCTCCACTTG |

Table S7: Reflex PCR primer sequences for Ion Torrent

| Name                         | Sequence                                     |
|------------------------------|----------------------------------------------|
| 454A (common reverse primer) | CCATCTCATCCCTGCGTGTCTCCGACTCAG               |
| cyp2d6-ref-pcr-IT-01         | CCTCTCTATGGGCAGTCGGTGATTAGGTACCCCATTCTAGCGG  |
| cyp2d6-ref-pcr-IT-02         | CCTCTCTATGGGCAGTCGGTGATCAGCAGGGAGGTGAAGAAGA  |
| cyp2d6-ref-pcr-IT-03         | CCTCTCTATGGGCAGTCGGTGATCTGGGTGATACCCCTGCAA   |
| cyp2d6-ref-pcr-IT-04         | CCTCTCTATGGGCAGTCGGTGATACAGGCACCTGCTGAGAAA   |
| cyp2d6-ref-pcr-IT-05         | CCTCTCTATGGGCAGTCGGTGATCTTCACAAAGTGGCCCTGG   |
| cyp2d6-ref-pcr-IT-06         | CCTCTCTATGGGCAGTCGGTGATGGAAGGGCTTCTCCAGA     |
| cyp2d6-ref-pcr-IT-07         | CCTCTCTATGGGCAGTCGGTGATCGATGACAGGTTGGTGATGA  |
| cyp2d6-ref-pcr-IT-08         | CCTCTCTATGGGCAGTCGGTGATCAGGGTGAGAGTGGGGACT   |
| cyp2d6-ref-pcr-IT-09         | CCTCTCTATGGGCAGTCGGTGATCCCTGCCACCAAACACAC    |
| cyp2d6-ref-pcr-IT-10         | CCTCTCTATGGGCAGTCGGTGATCACAGCTGGACTCTGTCAACT |
| cyp2d6-ref-pcr-IT-11         | CCTCTCTATGGGCAGTCGGTGATTCCACAGTACCCTCTCCGAC  |
| cyp2d6-ref-pcr-IT-12         | CCTCTCTATGGGCAGTCGGTGATACACTGCCCCCTCTCCCT    |
| cyp2d6-ref-pcr-IT-13         | CCTCTCTATGGGCAGTCGGTGATATTCTGGCAGGTCCTGGTTT  |
| cyp2d6-ref-pcr-IT-14         | CCTCTCTATGGGCAGTCGGTGATGGGCTCTGGATGGACAGG    |
| cyp2d6-ref-pcr-IT-15         | CCTCTCTATGGGCAGTCGGTGATGACAGTCAGTGTGGTGGCAT  |
| cyp2d6-ref-pcr-IT-16         | CCTCTCTATGGGCAGTCGGTGATCAGGGTTCCTAGAGTGGGC   |
| cyp2d6-ref-pcr-IT-17         | CCTCTCTATGGGCAGTCGGTGATGTGCTGAGCTGGGGTGAG    |
| cyp2d6-ref-pcr-IT-18         | CCTCTCTATGGGCAGTCGGTGATCCTACCTTAGGGATGCGGA   |
| cyp2d6-ref-pcr-IT-19         | CCTCTCTATGGGCAGTCGGTGATCATATGGGTCACACCCAGG   |
| cyp2d6-ref-pcr-IT-20         | CCTCTCTATGGGCAGTCGGTGATCTGGTCACCCATCTCTGGTC  |
| cyp2d6-ref-pcr-IT-21         | CCTCTCTATGGGCAGTCGGTGATTCTGTCGATCTCCTGTTGGAC |
| cyp2d6-ref-pcr-IT-22         | CCTCTCTATGGGCAGTCGGTGATTGACACTCCTTCTTGCCCTCC |
| cyp2d6-ref-pcr-IT-23         | CCTCTCTATGGGCAGTCGGTGATAGGATCCTGGTCAAGCCT    |
| cyp2d6-ref-pcr-IT-24         | CCTCTCTATGGGCAGTCGGTGATCCAGCAAAGTTCATGGGC    |
| cyp2d6-ref-pcr-IT-25         | CCTCTCTATGGGCAGTCGGTGATACTGTTTCCCAGATGGGCTC  |
| cyp2d6-ref-pcr-IT-26         | CCTCTCTATGGGCAGTCGGTGATTAGGATCATGAGCAGGAGGC  |

|                      |                                               |
|----------------------|-----------------------------------------------|
| cyp2d6-ref-pcr-IT-27 | CCTCTCTATGGGCAGTCGGTGATCATCCCCGGCAGAGAACAG    |
| cyp2d6-ref-pcr-IT-28 | CCTCTCTATGGGCAGTCGGTGATTTGAAGCTGCTCTCAGGGTT   |
| cyp2d6-ref-pcr-IT-29 | CCTCTCTATGGGCAGTCGGTGATAGCATACTCGGGACAGAACG   |
| cyp2d6-ref-pcr-IT-30 | CCTCTCTATGGGCAGTCGGTGATATGACCTCCAATTCTGCACC   |
| cyp2d6-ref-pcr-IT-31 | CCTCTCTATGGGCAGTCGGTGATCAGCCTCCCCCTCATTCT     |
| cyp2d6-ref-pcr-IT-32 | CCTCTCTATGGGCAGTCGGTGATCATCTCTGCCAGGAAGGC     |
| cyp2d6-ref-pcr-IT-33 | CCTCTCTATGGGCAGTCGGTGATTGGGTCCCAGGTCATCCT     |
| cyp2d6-ref-pcr-IT-34 | CCTCTCTATGGGCAGTCGGTGATAGCTGGGTCAGGAAAGCCT    |
| cyp2d6-ref-pcr-IT-35 | CCTCTCTATGGGCAGTCGGTGATATATGCAGGAGGACGGGG     |
| cyp2d6-ref-pcr-IT-36 | CCTCTCTATGGGCAGTCGGTGATGTCTCAATCCCTCCTGTGCT   |
| cyp2d6-ref-pcr-IT-37 | CCTCTCTATGGGCAGTCGGTGATCATCTCCAGGTAGACCCAGG   |
| cyp2d6-ref-pcr-IT-38 | CCTCTCTATGGGCAGTCGGTGATCTCACCAAGTCCCTCCCC     |
| cyp2d6-ref-pcr-IT-39 | CCTCTCTATGGGCAGTCGGTGATCTCCTTGCCCAGAGGAGAA    |
| cyp2d6-ref-pcr-IT-40 | CCTCTCTATGGGCAGTCGGTGATTGACGTGGATAGGAGGTACAGA |
| cyp2d6-ref-pcr-IT-41 | CCTCTCTATGGGCAGTCGGTGATCCATGTCTGAGATGTCCCCT   |
| cyp2d6-ref-pcr-IT-42 | CCTCTCTATGGGCAGTCGGTGATGTCCTTTCCCAAACCCATCT   |
| cyp2d6-ref-pcr-IT-43 | CCTCTCTATGGGCAGTCGGTGATCTGCAGAGACTCCTCGGTCT   |
| cyp2d6-ref-pcr-IT-44 | CCTCTCTATGGGCAGTCGGTGATCCTGAGCTAGGTCCAGCA     |
| cyp2d6-ref-pcr-IT-45 | CCTCTCTATGGGCAGTCGGTGATGAGGGAGGCGATCACGTT     |
| cyp2d6-ref-pcr-IT-46 | CCTCTCTATGGGCAGTCGGTGATGGTGGGAGATGCGGGTAA     |
| cyp2d6-ref-pcr-IT-47 | CCTCTCTATGGGCAGTCGGTGATGCTCCAGCGACTTCTTGC     |
| cyp2d6-ref-pcr-IT-48 | CCTCTCTATGGGCAGTCGGTGATCATTAGCCCCACCATCCA     |
| cyp2d6-ref-pcr-IT-49 | CCTCTCTATGGGCAGTCGGTGATCTATGCTCCCCCTGGTCTC    |
| cyp2d6-ref-pcr-IT-50 | CCTCTCTATGGGCAGTCGGTGATGTCACAGGGCCCACTCTTT    |
| cyp2d6-ref-pcr-IT-51 | CCTCTCTATGGGCAGTCGGTGATTCTCTGCCACCCTGACC      |
| cyp2d6-ref-pcr-IT-52 | CCTCTCTATGGGCAGTCGGTGATGCCACCCACACTGAGCTT     |
| cyp2d6-ref-pcr-IT-53 | CCTCTCTATGGGCAGTCGGTGATCCCACTTCGACACCGGAT     |
| cyp2d6-ref-pcr-IT-54 | CCTCTCTATGGGCAGTCGGTGATCTCACCCATTGGGCTCCT     |
| cyp2d6-ref-pcr-IT-55 | CCTCTCTATGGGCAGTCGGTGATCCACTCGTCACAAGCCCC     |
| cyp2d6-ref-pcr-IT-56 | CCTCTCTATGGGCAGTCGGTGATCAGGTGGTTTCTTGCCCC     |

|                      |                                                |
|----------------------|------------------------------------------------|
| cyp2d6-ref-pcr-IT-57 | CCTCTCTATGGGCAGTCGGTGATGGAAATCTGTCTCTGTCCCC    |
| cyp2d6-ref-pcr-IT-58 | CCTCTCTATGGGCAGTCGGTGATCAGCCCATTGAGCACGAC      |
| cyp2d6-ref-pcr-IT-59 | CCTCTCTATGGGCAGTCGGTGATCAGCTGCAGGCTGAACAC      |
| cyp2d6-ref-pcr-IT-60 | CCTCTCTATGGGCAGTCGGTGATGCCTCTTGCAAGCCAGGAT     |
| cyp2d6-ref-pcr-IT-61 | CCTCTCTATGGGCAGTCGGTGATTCCATTTGAACCTTGGACG     |
| cyp2d6-ref-pcr-IT-62 | CCTCTCTATGGGCAGTCGGTGATAGCAGGTGGAAGGAGGAGA     |
| cyp2d6-ref-pcr-IT-63 | CCTCTCTATGGGCAGTCGGTGATTGTGATGGAGGAACTCAGTTTG  |
| cyp2d6-ref-pcr-IT-64 | CCTCTCTATGGGCAGTCGGTGATCCTTGCAAGAGTCACCAAAA    |
| cyp2d6-ref-pcr-IT-65 | CCTCTCTATGGGCAGTCGGTGATCATCCCATTCCCAGATGATG    |
| cyp2d6-ref-pcr-IT-66 | CCTCTCTATGGGCAGTCGGTGATCCACAGTGCAAAGGTTTGA     |
| cyp2d6-ref-pcr-IT-67 | CCTCTCTATGGGCAGTCGGTGATCTTCATCCTCGATTTTCGTGA   |
| cyp2d6-ref-pcr-IT-68 | CCTCTCTATGGGCAGTCGGTGATCTCATCTTCCATTCCCAAGG    |
| cyp2d6-ref-pcr-IT-69 | CCTCTCTATGGGCAGTCGGTGATACTGCCAAGTCCAGCTCCA     |
| cyp2d6-ref-pcr-IT-70 | CCTCTCTATGGGCAGTCGGTGATCATGTATAAATGCCCTTCTCCAG |
| cyp2d6-ref-pcr-IT-71 | CCTCTCTATGGGCAGTCGGTGATGCTTCTGGTCCAGCCTGT      |
| cyp2d6-ref-pcr-IT-72 | CCTCTCTATGGGCAGTCGGTGATTCCAGGACCTCCTCCCTC      |
| cyp2d6-ref-pcr-IT-73 | CCTCTCTATGGGCAGTCGGTGATCACATGCAGCAGGTTGCC      |
| cyp2d6-ref-pcr-IT-74 | CCTCTCTATGGGCAGTCGGTGATGCATCAGGTCCACCAGGA      |
| cyp2d6-ref-pcr-IT-75 | CCTCTCTATGGGCAGTCGGTGATTGCTTCTAGCCCCATACCTG    |
| cyp2d6-ref-pcr-IT-76 | CCTCTCTATGGGCAGTCGGTGATACCCCACCAGGCACAGAG      |
| cyp2d6-ref-pcr-IT-77 | CCTCTCTATGGGCAGTCGGTGATACTCTCAGCACACCGAGCG     |
| cyp2d6-ref-pcr-IT-78 | CCTCTCTATGGGCAGTCGGTGATTGAGTGAACCTGCTGTGTTG    |
| cyp2d6-ref-pcr-IT-79 | CCTCTCTATGGGCAGTCGGTGATGTATGGGCTGCTCCAGAGGT    |
| cyp2d6-ref-pcr-IT-80 | CCTCTCTATGGGCAGTCGGTGATCTCCAGGCCCTTACCCAG      |
| cyp2d6-ref-pcr-IT-81 | CCTCTCTATGGGCAGTCGGTGATAGAAGTACCCCCTCTCCC      |
| cyp2d6-ref-pcr-IT-82 | CCTCTCTATGGGCAGTCGGTGATCTGCAAAGCCTTCTGGGATA    |
| cyp2d6-ref-pcr-IT-83 | CCTCTCTATGGGCAGTCGGTGATCCAGCTAGGCTCATAACCCC    |
| cyp2d6-ref-pcr-IT-84 | CCTCTCTATGGGCAGTCGGTGATAACATGGCCTTGCCCTTT      |
| cyp2d6-ref-pcr-IT-85 | CCTCTCTATGGGCAGTCGGTGATCCAGAGTGACCTTCAGCACC    |
| cyp2d6-ref-pcr-IT-86 | CCTCTCTATGGGCAGTCGGTGATCTTACCTGGGGCCTTAGAGC    |



|                      |                                                    |
|----------------------|----------------------------------------------------|
| cyp2d6-ref-pcr-IT-87 | CCTCTCTATGGGCAGTCGGTGATCACAGACGCTATGCACACAC        |
| cyp2d6-ref-pcr-IT-88 | CCTCTCTATGGGCAGTCGGTGATTGTCCACTCCCAGACACTTG        |
| cyp2d6-ref-pcr-IT-89 | CCTCTCTATGGGCAGTCGGTGATTTGCAGGGACACGATTACAC        |
| cyp2d6-ref-pcr-IT-90 | CCTCTCTATGGGCAGTCGGTGATCAAAGACAATATTCACACATACACAGA |
| cyp2d6-ref-pcr-IT-91 | CCTCTCTATGGGCAGTCGGTGATCACATTCTCTCTCACACACACC      |
| cyp2d6-ref-pcr-IT-92 | CCTCTCTATGGGCAGTCGGTGATGGCACCAAGTACCCCACTT         |
| cyp2d6-ref-pcr-IT-93 | CCTCTCTATGGGCAGTCGGTGATTGGATGGGACCACTCCTG          |
| cyp2d6-ref-pcr-IT-94 | CCTCTCTATGGGCAGTCGGTGATCCACATTCTGGGCTCTG           |
| cyp2d6-ref-pcr-IT-95 | CCTCTCTATGGGCAGTCGGTGATCAACAGGGCTGTTCCCAG          |
| cyp2d6-ref-pcr-IT-55 | CCTCTCTATGGGCAGTCGGTGATCCACTCGTCACAAGCCCC          |
| cyp2d6-ref-pcr-IT-56 | CCTCTCTATGGGCAGTCGGTGATCAGGTGGTTTCTTGCCCC          |
| cyp2d6-ref-pcr-IT-57 | CCTCTCTATGGGCAGTCGGTGATGGAAATCTGTCTCTGTCCCC        |
| cyp2d6-ref-pcr-IT-58 | CCTCTCTATGGGCAGTCGGTGATCAGCCCATTGAGCACGAC          |
| cyp2d6-ref-pcr-IT-59 | CCTCTCTATGGGCAGTCGGTGATCAGCTGCAGGCTGAACAC          |
| cyp2d6-ref-pcr-IT-60 | CCTCTCTATGGGCAGTCGGTGATGCCTCTTGCAAGCCAGGAT         |
| cyp2d6-ref-pcr-IT-61 | CCTCTCTATGGGCAGTCGGTGATTCTATTTGAACCTTGGACG         |
| cyp2d6-ref-pcr-IT-62 | CCTCTCTATGGGCAGTCGGTGATAGCAGGTGGAAGGAGGAGA         |
| cyp2d6-ref-pcr-IT-63 | CCTCTCTATGGGCAGTCGGTGATTGTGATGGAGGAACTCAGTTTG      |
| cyp2d6-ref-pcr-IT-64 | CCTCTCTATGGGCAGTCGGTGATCCTTGCAAGAGTCACCAAAA        |
| cyp2d6-ref-pcr-IT-65 | CCTCTCTATGGGCAGTCGGTGATCATCCCATTCCCAGATGATG        |
| cyp2d6-ref-pcr-IT-66 | CCTCTCTATGGGCAGTCGGTGATCCACAGTGCAAAAGGTTTGA        |
| cyp2d6-ref-pcr-IT-67 | CCTCTCTATGGGCAGTCGGTGATCTTCATCCTCGATTTCTGTA        |
| cyp2d6-ref-pcr-IT-68 | CCTCTCTATGGGCAGTCGGTGATCTCATCTTCCATTCCCAAGG        |
| cyp2d6-ref-pcr-IT-69 | CCTCTCTATGGGCAGTCGGTGATACTGCCAAGTCCAGCTCCA         |
| cyp2d6-ref-pcr-IT-70 | CCTCTCTATGGGCAGTCGGTGATCATGTATAAATGCCCTTCTCCAG     |
| cyp2d6-ref-pcr-IT-71 | CCTCTCTATGGGCAGTCGGTGATGCTTCTGGTCCAGCCTGT          |
| cyp2d6-ref-pcr-IT-72 | CCTCTCTATGGGCAGTCGGTGATTCCAGGACCTCCTCCCTC          |
| cyp2d6-ref-pcr-IT-73 | CCTCTCTATGGGCAGTCGGTGATCACATGCAGCAGGTTGCC          |
| cyp2d6-ref-pcr-IT-74 | CCTCTCTATGGGCAGTCGGTGATGCATCAGGTCCACCAGGA          |
| cyp2d6-ref-pcr-IT-75 | CCTCTCTATGGGCAGTCGGTGATTGCTTCTAGCCCCATACCTG        |

|                      |                                                    |
|----------------------|----------------------------------------------------|
| cyp2d6-ref-pcr-IT-76 | CCTCTCTATGGGCAGTCGGTGATAACCCACCAGGCACAGAG          |
| cyp2d6-ref-pcr-IT-77 | CCTCTCTATGGGCAGTCGGTGATACTCTCAGCACACCGAGCG         |
| cyp2d6-ref-pcr-IT-78 | CCTCTCTATGGGCAGTCGGTGATTGAGTGAACCTGCTGTGTTG        |
| cyp2d6-ref-pcr-IT-79 | CCTCTCTATGGGCAGTCGGTGATGTATGGGCTGCTCCAGAGGT        |
| cyp2d6-ref-pcr-IT-80 | CCTCTCTATGGGCAGTCGGTGATCTCCAGGCCCTTACCCAG          |
| cyp2d6-ref-pcr-IT-81 | CCTCTCTATGGGCAGTCGGTGATAGAAGTCACCCCTCTCCC          |
| cyp2d6-ref-pcr-IT-82 | CCTCTCTATGGGCAGTCGGTGATCTGCAAAGCCTTCTGGGATA        |
| cyp2d6-ref-pcr-IT-83 | CCTCTCTATGGGCAGTCGGTGATCCAGCTAGGCTCATAACCC         |
| cyp2d6-ref-pcr-IT-84 | CCTCTCTATGGGCAGTCGGTGATAACATGGCCTTGCCCTTT          |
| cyp2d6-ref-pcr-IT-85 | CCTCTCTATGGGCAGTCGGTGATCCAGAGTGACCTTCAGCACC        |
| cyp2d6-ref-pcr-IT-86 | CCTCTCTATGGGCAGTCGGTGATCTTACCTGGGGCCTTAGAGC        |
| cyp2d6-ref-pcr-IT-87 | CCTCTCTATGGGCAGTCGGTGATCACAGACGCTATGCACACAC        |
| cyp2d6-ref-pcr-IT-88 | CCTCTCTATGGGCAGTCGGTGATTGTCCACTCCCAGACACTTG        |
| cyp2d6-ref-pcr-IT-89 | CCTCTCTATGGGCAGTCGGTGATTTGCAGGGACACGATTACAC        |
| cyp2d6-ref-pcr-IT-90 | CCTCTCTATGGGCAGTCGGTGATCAAAGACAATATTCACACATACACAGA |
| cyp2d6-ref-pcr-IT-91 | CCTCTCTATGGGCAGTCGGTGATCACATTCTCTCTCACACACACC      |
| cyp2d6-ref-pcr-IT-92 | CCTCTCTATGGGCAGTCGGTGATGGCACCAAGTACCCCACTT         |
| cyp2d6-ref-pcr-IT-93 | CCTCTCTATGGGCAGTCGGTGATTGGATGGGACCACTCCTG          |
| cyp2d6-ref-pcr-IT-94 | CCTCTCTATGGGCAGTCGGTGATCCACATTCTGGGCTCTG           |
| cyp2d6-ref-pcr-IT-95 | CCTCTCTATGGGCAGTCGGTGATCAACAGGGCTGTTCCAG           |
